# Supplementary material
Source: PubMed Central journal article supplement (PMC8092898)
Supplement: AAC.02190-20-s000S1.pdf [file AAC.02190-20-s000S1.pdf]

## 1 Supplemental material

2

3 **Table S1.** Thermal stabilization of Pks13-TE with compounds by nanoDSF.

| ID         | Structure                                                                           | $\Delta T_m^a, ^\circ\text{C}$ |           | MIC <sup>b</sup> ,<br>$\mu\text{g/mL}$ |
|------------|-------------------------------------------------------------------------------------|--------------------------------|-----------|----------------------------------------|
|            |                                                                                     | 5X                             | 10X       |                                        |
| DMSO       |                                                                                     | -1.4±0.07                      |           | -                                      |
| Compound 1 | 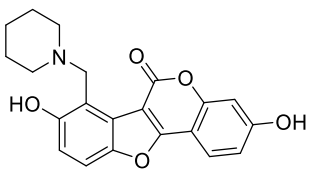   | 9.8±0.54                       | 9.9±0.10  | 0.0039                                 |
| Compound 2 |   | 10.1±0.04                      | 10.4±0.01 | 0.0039                                 |
| Compound 3 |  | 10.0±0.13                      | 9.3±0.15  | 0.125-0.25                             |
| Compound 4 |  | 9.8±0.24                       | 10.0±0.08 | 0.25                                   |
| Compound 5 |  | 9.1±0.09                       | 9.1±0.11  | 0.5                                    |

|                   |                                                                                   |          |           |        |
|-------------------|-----------------------------------------------------------------------------------|----------|-----------|--------|
| <b>Compound 6</b> | 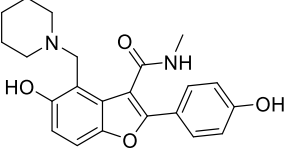 | 8.9±0.09 | 10.1±0.07 | 0.0313 |
| <b>Compound 7</b> |  | 0.4±0.16 | 1.0±0.043 | > 64   |

4

5 Note: Compound 7 was a non-inhibitor control.

6

7

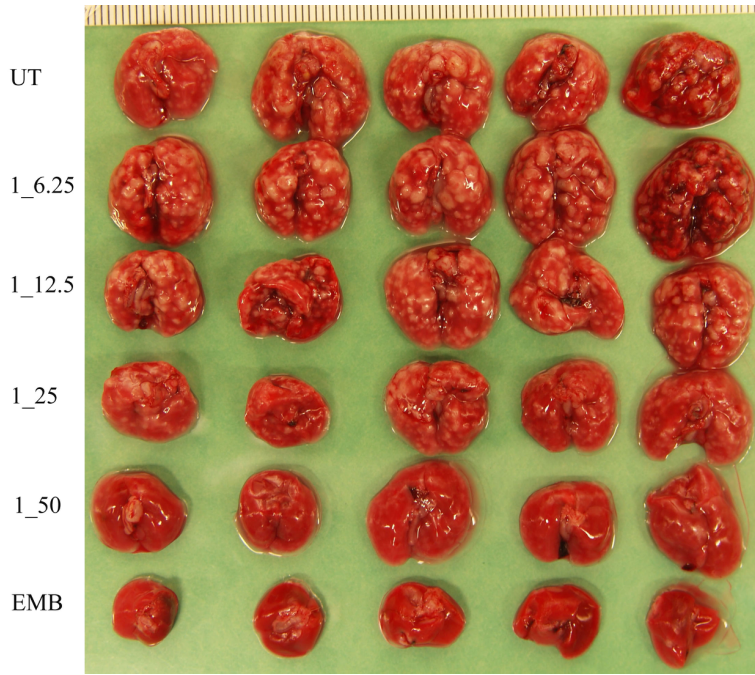

8

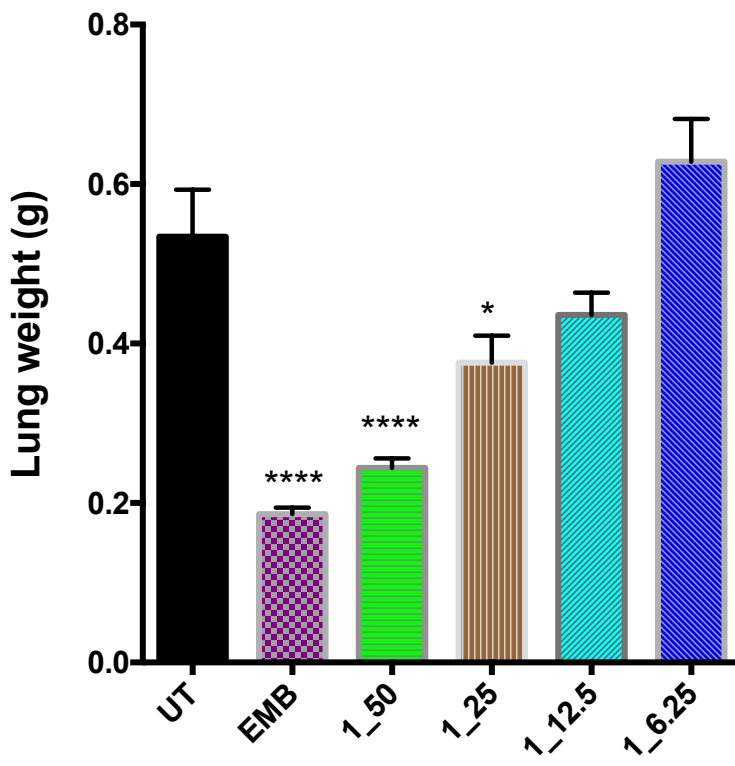

9

10

11 Fig. S1. Mouse lung gross pathology (upper panel) and lung weight (lower panel) in the  
12 acute model. Mice were infected with  $3.2 \cdot 10^8$  CFU by the aerosol route and treatment  
13 was initiated on day 1 after infection. Lungs were removed after four weeks of  
14 monotherapy. UT, untreated; EMB, ethambutol (100 mg/kg); **1\_50**, compound **1**  
15 (50mg/kg). Data represent mean lung weight of five BALB/c mice as mean $\pm$ SEM. One-  
16 way ANOVA and Tukey's multiple comparisons test was applied and significant  
17 differences from untreated control were indicated (\*,  $p < 0.05$ ; \*\*\*\*,  $p < 0.0001$ ).

18

19

20

21

22

23

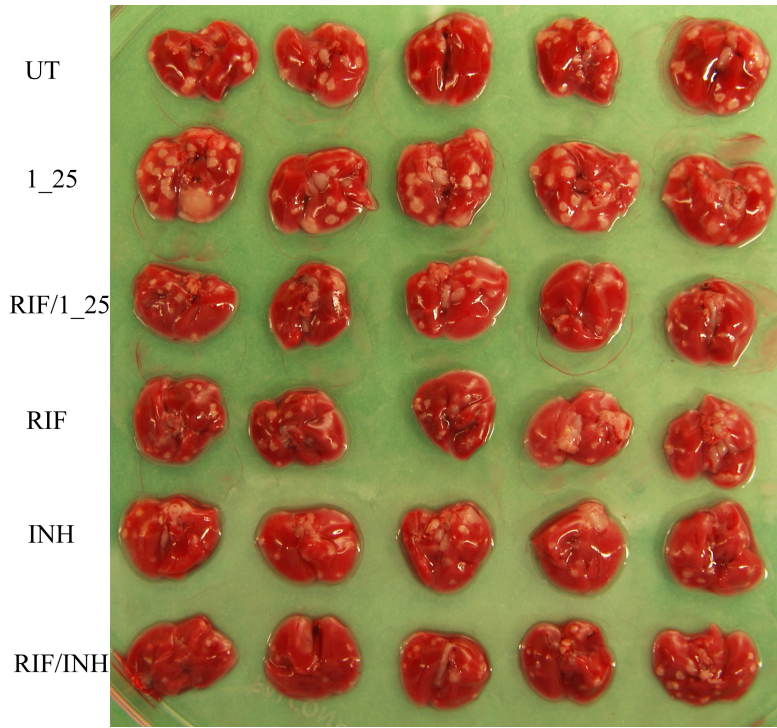

24

25

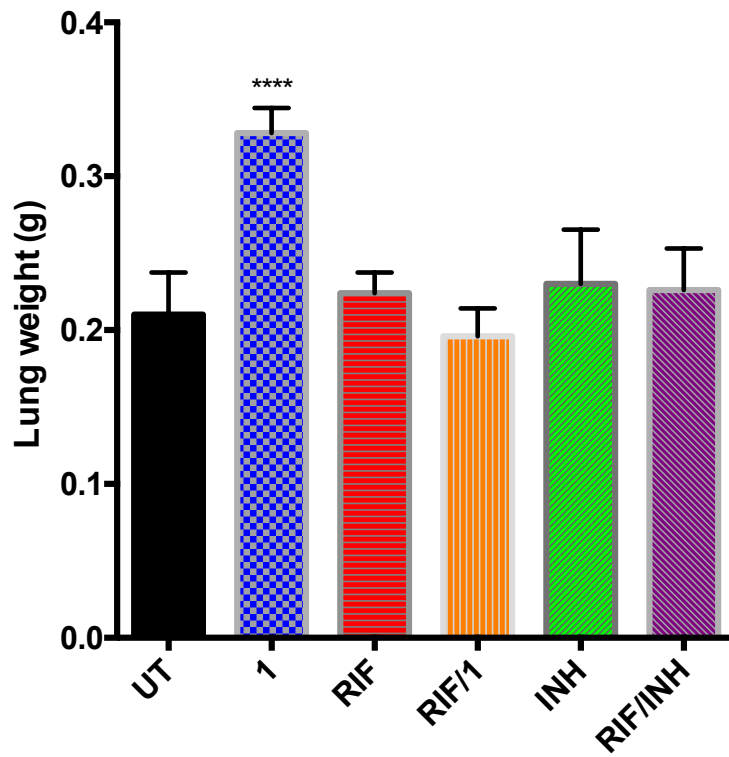

26

27

28 Fig. S2. Mouse lung gross pathology (upper panel) and lung weight (lower panel) in the  
29 chronic model. Mice were infected with  $2.0 \cdot 10^{10}$  CFU by the aerosol route and treatment  
30 was initiated 28 days after infection. Lungs were removed after eight weeks of combination  
31 therapy. UT, untreated; **1**, compound **1** (25 mg/kg); RIF, rifampin (10 mg/kg); INH,  
32 isoniazid (10 mg/kg). Data represent mean lung weight of five BALB/c mice as mean $\pm$ SD.  
33 One-way ANOVA and Tukey's multiple comparisons test was applied and significant  
34 differences from untreated control were indicated (\*\*\*\*,  $p < 0.0001$ ).

35

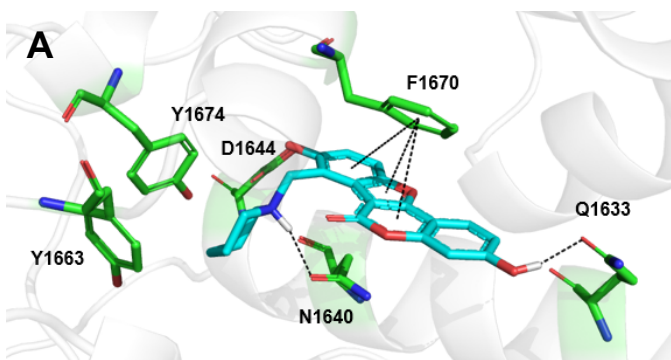

36

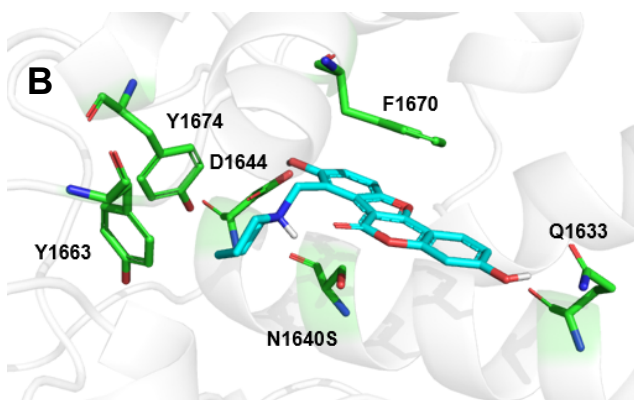

37

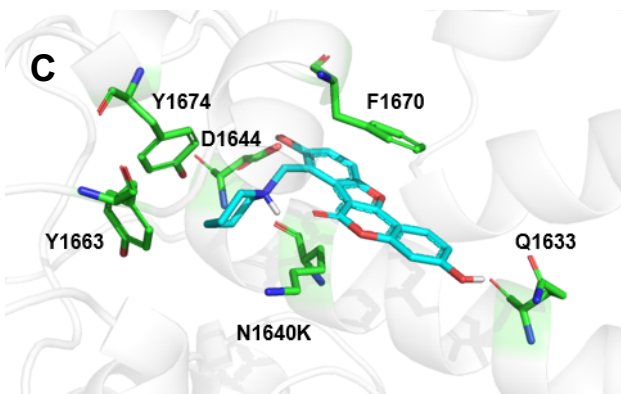

38

39 **Fig S3.** Proposed binding modes of compound 1 (colored cyan). Docking modes of  
 40 compound 1 with Pks13-TE (A). N at 1640 was mutated into S (B) and K (C) respectively.  
 41 The key amino acid residues are colored green in the active site of Pks13-TE (PDB ID  
 42 5V3Y).

43

44

45 **Supplemental methods and data analysis:**

46

47 **Expression and purification of Pks13-TE**

48 Sequence of the Mtb Pks13 gene (Rv3800c) was obtained. The wild-type Pks13-TE  
49 domain construct gene was cloned and inserted into PMCSG-19 plasmid, which was  
50 synthesized by Generay Biotechnology (Shanghai, China). The expression of the N-Mbp-  
51 His tagged Pks13-TE protein was induced with 0.5 mM IPTG in E. coli BL21(DE3)pLysS  
52 strains (Shanghai Institute of Materia Media, China), and the cells were harvested at 20 °C  
53 after 18 h of growth. Similar to the procedures reported previously, the Pks13 TE protein  
54 was purified by Nickle-affinity chromatography, followed by a step of TEV protease  
55 digestion to remove His-tag. Digested mixtures were loaded onto the anion exchange  
56 column (Mono Q 10/100 GL, GE Healthcare) and Superdex-75 gel filtration column (GE  
57 Healthcare), eluted with a buffer of 20 mM Tris-HCl, pH 8.0, 100 mM NaCl, and 1 mM  
58 DTT. Fractions were collected with > 95% purity monitored by SDS-PAGE. The Pks13 TE  
59 protein was stored at -80 °C for further bioassays.

60

61 **NanoDSF assay.**

62 To a solution of 1 mM of Pks13-TE protein in buffer (100 mM NaCl, 20 mM Tris-HCl pH  
63 8.0) was incubated with different concentrations of tested compounds (5 and 10 mM in  
64 DMSO) in a 30 µL reaction volume for 30 min, and drug-free proteins containing DMSO  
65 solution served as a blank control. Approximately 10 µL of the supernatant fraction was  
66 loaded to each capillary, which was then placed on the holder in the sample rack. The



67 thermal denaturation curves were determined by the measurement of the protein intrinsic  
68 fluorescence on label-free native nanoDSF (NanoTemper, Prometheus NT.48). The  
69 temperature was increased from 20 to 90 °C at a rate of 2°C·min<sup>-1</sup>. The fluorescence  
70 intensity was recorded at 330 and 350 nm, respectively. Changes in the fluorescence ratio  
71 (F350/F330) was monitored to determine the apparent melting temperature ( $T_m$ ).

72

### 73 **Thermal Stability Analysis**

74 To further probe their interaction on molecular level, Compound 1-6 were evaluated for  
75 thermal stability of Pks13-TE using nano differential scanning fluorimetry (nanoDSF)  
76 method. It measures the thermal unfolding transitions ( $T_m$ ) of protein under native  
77 conditions, and no extra dye is required. The binding of ligands to proteins generally leads  
78 to thermal stability shift of proteins. Stabilization was evaluated by comparing the melting  
79 temperatures ( $T_m$ ) of Pks13-TE ( $56.9 \pm 0.05$  °C) in the absence and presence of the  
80 compounds and calculating the shift in the  $T_m$  ( $\Delta T_m$ ). A significant increase in thermal  
81 stability of Pks13-TE was observed following the addition of the 5-fold or 10-fold  
82 compound **1-6** ( $\Delta T_m > 8.0$  °C, Table **5**), indicating binding of the compounds. Compared to  
83 the negative control compound **7** ( $\Delta T_m < 3.0$  °C), had no effect on the thermal stability of  
84 Pks13-TE. The result is in agreement with its MIC.

85

### 86 **Molecular Docking**

87 For the molecular docking of compound **1**, we used the solved crystal structures of  
88 Pks13-TE (PDB ID 5V3Y). First asparagine (N) at 1640 of Pks13-TE was mutated into  
89 serine (S) and lysine (K) respectively. And then the protein structure was prepared by

90 Protein Preparation Wizard. In this step, missing atoms and all hydrogen atoms were  
91 added to the protein according to their local environment. Compound **1** was flexibly  
92 docked into the binding pocket defined by residues Q1633, F1670, Y1674, and S1640 or  
93 K1640 using Glide. Pks13 interactions with compound **1** was pictured using PyMOL  
94 (Release 2.4.0, Schrödinger, Inc). All the molecular docking work was performed using  
95 the Maestro software (Release 2020-4, Schrödinger, LLC).

96

97
